# Supplementary material for: Specific Dysregulation of IFNγ Production by Natural Killer Cells Confers Susceptibility to Viral Infection
Source: PubMed Central journal article supplement (PMC4256466; doi:10.1371/journal.ppat.1004511), 2014-12-04
Supplement: ppat.1004511.s009.pdf [file ppat.1004511.s009.pdf]

Supplementary Table 1: NKC and H2 inheritance in the RCS strains

| <b>AcB Strains</b> | <b>NKC</b> | <b>H2</b> |
|--------------------|------------|-----------|
| AcB1               | A/J        | A/J       |
| AcB4               | A/J        | A/J       |
| AcB5               | A/J        | A/J       |
| AcB7               | A/J        | A/J       |
| AcB10              | A/J        | A/J       |
| AcB11              | A/J        | A/J       |
| AcB14              | A/J        | A/J       |
| AcB19              | A/J        | A/J       |
| AcB20              | A/J        | A/J       |
| AcB21              | A/J        | A/J       |
| AcB22              | A/J        | A/J       |
| AcB23              | A/J        | B6        |
| AcB29              | A/J        | A/J       |
| AcB30              | A/J        | A/J       |
|                    |            |           |
|                    |            |           |
|                    |            |           |
|                    |            |           |
|                    |            |           |
|                    |            |           |
|                    |            |           |
|                    |            |           |
|                    |            |           |

| <b>BcA Strains</b> | <b>NKC</b> | <b>H2</b> |
|--------------------|------------|-----------|
| BcA1               | B6         | B6        |
| BcA2               | B6         | B6        |
| BcA3               | B6         | B6        |
| BcA4               | B6         | A/J       |
| BcA6               | B6         | B6        |
| BcA7               | B6         | B6        |
| BcA9               | B6         | B6        |
| BcA12              | B6         | B6        |
| BcA14              | B6         | B6        |
| BcA17              | A/J        | A/J       |
| BcA18              | B6         | B6        |
| BcA19              | A/J        | A/J       |
| BcA20              | B6         | B6        |
| BcA21              | B6         | B6        |
| BcA23              | B6         | B6        |
| BcA24              | B6         | B6        |
| BcA26              | B6         | B6        |
| BcA27              | A/J        | B6        |
| BcA28              | B6         | B6        |
| BcA29              | B6         | B6        |
| BcA30              | B6         | B6        |
