# Supplementary material for: Specific Dysregulation of IFNγ Production by Natural Killer Cells Confers Susceptibility to Viral Infection
Source: PubMed Central journal article supplement (PMC4256466; doi:10.1371/journal.ppat.1004511), 2014-12-04
Supplement: ppat.1004511.s010.pdf [file ppat.1004511.s010.pdf]

Supplementary Table 2: List of genes in the vicinity of Chromosome 10 QTL

| Gene Symbol | Gene name                                        | Start     | End       | Ref Seq      |
|-------------|--------------------------------------------------|-----------|-----------|--------------|
| Trhde       | TRH-degrading enzyme                             | 113836078 | 114238420 | NM_146241    |
| Tbc1d15     | TBC1 domain family, member 15                    | 114635513 | 114688521 | NM_025706    |
| Rab21       | RAB21, member RAS oncogene family                | 114726917 | 114752647 | NM_024454    |
| Tmem19      | transmembrane protein 19                         | 114777795 | 114799287 | NM_133683    |
| Thap2       | THAP domain containing, apoptosis associated     | 114807021 | 114821491 | NM_025780    |
| Tbc1d15     | TBC1 domain family, member 15                    | 114635513 | 114688521 | NM_025706    |
| Ccdc131     | proline/serine-rich coiled-coil 2                | 114822014 | 114869827 | NM_001033261 |
| Lgr5        | leucine rich repeat containing G protein coupled | 114887369 | 115024836 | NM_010195    |
| Tspan8      | tetraspanin 8                                    | 115254326 | 115286672 | NM_146010    |
| Ptprr       | protein tyrosine phosphatase, receptor type, R   | 115455454 | 115711985 | NM_011217    |
| Kcnmb4      | calcium activated potassium channel beta 4       | 115854923 | 115910579 | NM_021452    |
| Cnot2       | CCR4-NOT transcription complex, subunit 2        | 115922221 | 115986231 | NM_028082    |
| Gm239       | hypothetical protein LOC237558                   | 116213600 | 116333935 | NM_001033333 |
| Rab3ip      | RAB3A interacting protein                        | 116342839 | 116387436 | NM_001003950 |
| Best3       | bestrophin 3                                     | 116423369 | 116462096 | NM_001007583 |
| Lrrc10      | leucine rich repeat containing 10                | 116482396 | 116483824 | NM_146242    |
| Cct2        | chaperonin subunit 2 (beta)                      | 116488053 | 116500870 | NM_007636    |
| Frs2        | fibroblast growth factor receptor substrate 2    | 116507182 | 116585530 | NM_177798    |
| Yeats4      | YEATS domain containing 4                        | 116652197 | 116654414 | NM_026570    |
| 9530003J2   |                                                  |           |           |              |
| 3Rik        | hypothetical protein LOC77397                    | 116669292 | 116675662 | NM_029906    |
| Lyzs        | lysozyme                                         | 116714596 | 116719328 | NM_017372    |
| Cpsf6       | cleavage and polyadenylation specific factor 6   | 116785262 | 116814005 | NM_001013391 |
| Mdm2        | transformed mouse 3T3 cell double minute 2       | 117125960 | 117147772 | NM_010786    |
| Slc35e3     | solute carrier family 35, member E3              | 117170733 | 117183414 | NM_029875    |
| Nup107      | nucleoporin 107                                  | 117187698 | 117229761 | NM_134010    |
| Rap1b       | RAS related protein 1b                           | 117251652 | 117283030 | NM_024457    |
| Mdm1        | transformed mouse 3T3 cell double minute 1       | 117578887 | 117585195 | NM_010785    |
| Il22        | interleukin 22                                   | 117641997 | 117647102 | NM_016971    |
| Il1fb       | interleukin 10-related T cell-derived inducible  | 117726685 | 117732094 | NM_054079    |
| Ifng        | interferon gamma                                 | 117878102 | 117882948 | NM_008337    |
| Dyrk2       | dual-specificity tyrosine-(Y)-phosphorylation    | 118296404 | 118305959 | NM_001014390 |
| Grip1       | glutamate receptor interacting protein 1 isoform | 118891369 | 119512649 | NM_130891    |
| Helb        | helicase (DNA) B                                 | 119520663 | 119549946 | NM_080446    |
| Irak3       | interleukin-1 receptor-associated kinase 3       | 119578709 | 119638593 | NM_028679    |
| Tmbim4      | transmembrane BAX inhibitor motif containing 4   | 119645881 | 119661953 | NM_026617    |
| 1190005P1   |                                                  |           |           |              |
| 7Rik        | hypothetical protein LOC66225                    | 119664115 | 119669126 | NM_025431    |
| Hmga2       | high mobility group AT-hook 2                    | 119798330 | 119913991 | NM_010441    |
| Msrb3       | methionine-R-sulfoxide reductase B3              | 120218156 | 120335908 | NM_177092    |
| Lemd3       | LEM domain containing 3                          | 120360466 | 120416386 | NM_001081193 |
| Trhde       | TRH-degrading enzyme                             | 113836078 | 114238420 | NM_146241    |
