# Supplementary material for: Specific Dysregulation of IFNγ Production by Natural Killer Cells Confers Susceptibility to Viral Infection
Source: PubMed Central journal article supplement (PMC4256466; doi:10.1371/journal.ppat.1004511), 2014-12-04
Supplement: ppat.1004511.s011.pdf [file ppat.1004511.s011.pdf]

Supplementary Table 3: Exome Sequencing analysis in A and B6 mice in the vicinity of Chromosome 10 QTL

| Gene name                   | Position  | Effect                                   | Effect type | Codon change   | Amino acid change | Gene type      | B6 reference allele                                    | Altred alleles                                | db_snp_id  | Presence in other strains | T cells | NK cells |
|-----------------------------|-----------|------------------------------------------|-------------|----------------|-------------------|----------------|--------------------------------------------------------|-----------------------------------------------|------------|---------------------------|---------|----------|
| Trhde                       | 113838413 | UTR_3_PRIME                              |             |                |                   | protein_coding | A                                                      | T                                             | rs29341542 |                           | +       | +        |
| Tph2                        | 114516680 | UTR_3_PRIME                              |             |                |                   | protein_coding | ACCCCC                                                 | ACCCCC<br>CC                                  | .          |                           | +       | +        |
| Tph2                        | 114516850 | NON_SYNONYMO<br>US_CODING                | MISSENSE    | cCc/cGc        | P447R             | protein_coding | G                                                      | C                                             | rs33849125 | DBA/2                     |         |          |
| Tbc1d15                     | 114636486 | UTR_3_PRIME                              |             |                |                   | protein_coding | ATCAGTACA<br>CTGTCTC                                   | ATC                                           | .          |                           | +/-     | +/-      |
| Tbc1d15                     | 114636536 | UTR_3_PRIME                              |             |                |                   | protein_coding | C                                                      | T                                             | rs46784319 | DBA/2,<br>129/S1          |         |          |
| Tbc1d15                     | 114636539 | UTR_3_PRIME                              |             |                |                   | protein_coding | G                                                      | A                                             | rs48390084 | DBA/2,<br>129/S1          |         |          |
| Tbc1d15                     | 114639607 | NON_SYNONYMO<br>US_CODING                | MISSENSE    | Ata/Gta        | I586V             | protein_coding | T                                                      | C                                             | rs29344612 | DBA/2,<br>129/S1          |         |          |
| Tspan8                      | 115254596 | UTR_5_PRIME                              |             |                |                   | protein_coding | A                                                      | C                                             | rs29349889 | DBA/2                     |         |          |
| Tspan8                      | 115286550 | UTR_3_PRIME                              |             |                |                   | protein_coding | G                                                      | T                                             | rs13473211 | DBA/2                     |         |          |
| Cpsf6                       | 116814084 | UPSTREAM                                 |             |                |                   | protein_coding | G                                                      | T                                             | .          |                           | +/-     | +/-      |
| Cpsf6                       | 116817914 | UPSTREAM                                 |             |                |                   | protein_coding | AGGTGGTG<br>GTGGTGGT<br>GGTGGTGG<br>TGGTGGTG<br>GTGGTG | AGGTG<br>GTGGTG<br>GTGGTG<br>GTGGTG<br>GTGGTG | .          |                           | +/-     | +/-      |
| Cpm                         | 117066546 | UPSTREAM                                 |             |                |                   | protein_coding | A                                                      | G                                             | rs33880972 | DBA/2                     |         |          |
| Mdm1                        | 117595588 | NON_SYNONYMO<br>US_CODING                | MISSENSE    | gAc/gGc        | D437G             | protein_coding | A                                                      | G                                             | rs52684110 | DBA/2,<br>129/S1,<br>C3H  |         |          |
| Mdm1                        | 117601369 | CODON_CHANGE<br>PLUS_CODON_I<br>NSERTION |             | gat/gaGGG<br>t | D572EG            | protein_coding | A                                                      | AGGG                                          | .          |                           | +/-     | +/-      |
| Il22                        | 117641848 | UPSTREAM                                 |             |                |                   | protein_coding | G                                                      | A                                             | rs49141619 | DBA/2                     |         |          |
| Il22                        | 117641875 | UPSTREAM                                 |             |                |                   | protein_coding | C                                                      | A                                             | .          |                           | ++      | +/-      |
| Il22                        | 117641885 | UPSTREAM                                 |             |                |                   | protein_coding | G                                                      | A                                             | rs46351844 | DBA/2                     |         |          |
| Il22                        | 117641918 | UPSTREAM                                 |             |                |                   | protein_coding | T                                                      | G                                             | rs50679834 | DBA/2                     |         |          |
| Il22                        | 117641956 | UPSTREAM                                 |             |                |                   | protein_coding | C                                                      | T                                             | .          |                           | ++      | +/-      |
| Il22                        | 117641959 | UPSTREAM                                 |             |                |                   | protein_coding | A                                                      | G                                             | .          |                           | ++      | +/-      |
| Il22                        | 117642043 | UTR_5_PRIME                              |             |                |                   | protein_coding | T                                                      | G                                             | .          | DBA/2                     |         |          |
| Il22                        | 117642044 | START_GAINED                             |             |                |                   | protein_coding | C                                                      | G                                             | rs48127970 | DBA/2,<br>129/S1,<br>C3H  |         |          |
| Il22                        | 117642690 | NON_SYNONYMO<br>US_CODING                | MISSENSE    | aGt/aAt        | S84N              | protein_coding | G                                                      | A                                             | rs29355558 | DBA/2                     |         |          |
| Il22                        | 117646696 | UTR_3_PRIME                              |             |                |                   | protein_coding | T                                                      | C                                             | rs29329802 | DBA/2,<br>129/S1          |         |          |
| Il1f1b                      | 117731402 | NON_SYNONYMO<br>US_CODING                | MISSENSE    | aGt/aAt        | S84N              | protein_coding | C                                                      | T                                             | rs50848176 | DBA/2                     |         |          |
| Il1f1b                      | 117731940 | NON_SYNONYMO<br>US_CODING                | MISSENSE    | Atc/Gtc        | I36V              | protein_coding | T                                                      | C                                             | rs46916394 | 129/S1,<br>C3H            |         |          |
| Il1f1b                      | 117732067 | UTR_5_PRIME                              |             |                |                   | protein_coding | A                                                      | C                                             | .          |                           | +       | +        |
| Il1f1b                      | 117732097 | UPSTREAM                                 |             |                |                   | protein_coding | C                                                      | T                                             | rs50966058 | DBA/2                     |         |          |
| 4932442<br>E05Rik,<br>Dyrk2 | 118298244 | FRAME_SHIFT                              |             |                |                   | protein_coding | AGGGGGGG<br>G                                          | AGGGG<br>GGG                                  | .          |                           | +       | +        |
| Grip1                       | 119334821 | NON_SYNONYMO<br>US_CODING                | MISSENSE    | Gca/Aca        | A36T              | protein_coding | G                                                      | A                                             | rs52029579 | DBA/2                     |         |          |
